# Supplementary material for: Constraining the accuracy of flux estimates using OTM 33A
Source: Copernicus journal article supplement (doi:10.5194/amt-13-341-2020), 2020-01-31
Supplement: Supplementary file 1 [file amt-13-341-2020-supplement.zip]

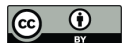

## *Supplement of*

# **Constraining the accuracy of flux estimates using OTM 33A**

**Rachel Edie et al.**

*Correspondence to:* Shane M. Murphy ([shane.murphy@uwyo.edu](mailto:shane.murphy@uwyo.edu))

- [amt-13-341-2020-supplement-title-page.pdf](#)
- [Final\\_Data.xlsx](#)
- [OTM\\_paper\\_SI\\_1212.pdf](#)

The copyright of individual parts of the supplement might differ from the CC BY 4.0 License.
